# Supplementary material
Source: PubMed Central journal article supplement (PMC3951727)
Supplement: NIHMS549599-supplement-01.pdf [file NIHMS549599-supplement-01.pdf]

Supplementary Materials:

**Table S1.** Associations between personality traits at age 26 and the constituent clinical indicators of the index of poor physical health at age 38

The table shows that individuals low in Conscientiousness and low in Openness-to-Experience were at greater health-risk across multiple clinical indicators. Descriptions of the cutoffs for each clinical indicator are detailed in **Table 2**. All analyses controlled for sex.

| Clinical Indicator                              | Extraversion |               |         | Agreeableness |               |         | Neuroticism |               |         | Conscientiousness |               |         | Openness-to-Experience |               |         |
|-------------------------------------------------|--------------|---------------|---------|---------------|---------------|---------|-------------|---------------|---------|-------------------|---------------|---------|------------------------|---------------|---------|
|                                                 | OR           | [95% CI]      | pvalue  | OR            | [95% CI]      | pvalue  | OR          | [95% CI]      | pvalue  | OR                | [95% CI]      | pvalue  | OR                     | [95% CI]      | pvalue  |
| Metabolic Abnormalities                         |              |               |         |               |               |         |             |               |         |                   |               |         |                        |               |         |
| Obesity (cm)                                    | 0.95         | [0.80 - 1.13] | 0.545   | 1.00          | [0.85 - 1.18] | 0.970   | 0.96        | [0.82 - 1.14] | 0.673   | 0.84              | [0.71 - 0.99] | 0.038 + | 0.85                   | [0.72 - 1.01] | 0.059 + |
| HDL (mmol/L)                                    | 0.94         | [0.80 - 1.09] | 0.391   | 0.93          | [0.80 - 1.09] | 0.387   | 0.98        | [0.84 - 1.16] | 0.849   | 0.82              | [0.69 - 0.96] | 0.013 + | 0.95                   | [0.81 - 1.11] | 0.507   |
| Triglycerides (mmol/L)                          | 0.97         | [0.83 - 1.14] | 0.748   | 0.96          | [0.83 - 1.13] | 0.651   | 1.00        | [0.85 - 1.17] | 0.986   | 0.86              | [0.73 - 1.01] | 0.075 + | 1.03                   | [0.88 - 1.21] | 0.673   |
| Blood Pressure (mmHg)                           | 0.96         | [0.82 - 1.12] | 0.566   | 1.00          | [0.86 - 1.17] | 0.977   | 1.05        | [0.90 - 1.22] | 0.525   | 1.00              | [0.85 - 1.18] | 0.993   | 0.89                   | [0.76 - 1.04] | 0.146   |
| Glycated Hemoglobin (%)                         | 0.84         | [0.70 - 1.01] | 0.061 + | 0.89          | [0.75 - 1.07] | 0.207   | 1.13        | [0.94 - 1.36] | 0.202   | 0.95              | [0.79 - 1.14] | 0.586   | 0.90                   | [0.75 - 1.09] | 0.278   |
| Cardiorespiratory Fitness (VO <sub>2</sub> max) | 0.90         | [0.75 - 1.07] | 0.212   | 0.88          | [0.74 - 1.05] | 0.158   | 1.10        | [0.93 - 1.31] | 0.259   | 0.83              | [0.70 - 0.99] | 0.036 + | 0.85                   | [0.73 - 1.01] | 0.058 + |
| Pulmonary Function ( FEV1/FVC ratio)            | 0.86         | [0.64 - 1.14] | 0.297   | 1.00          | [0.74 - 1.35] | 1.000   | 1.10        | [0.86 - 1.41] | 0.448   | 0.95              | [0.72 - 1.27] | 0.747   | 0.70                   | [0.52 - 0.95] | 0.020 + |
| Periodontal Disease (sites with 5+mm CAL)       | 0.84         | [0.71 - 0.99] | 0.035 + | 0.80          | [0.68 - 0.94] | 0.006 + | 1.21        | [1.03 - 1.42] | 0.018 + | 0.77              | [0.65 - 0.91] | 0.002 + | 0.83                   | [0.70 - 0.99] | 0.033 + |
| Systemic Inflammation (hsCRP mg/L)              | 0.98         | [0.81 - 1.18] | 0.835   | 0.92          | [0.78 - 1.09] | 0.332   | 1.15        | [0.98 - 1.36] | 0.095 + | 0.91              | [0.77 - 1.08] | 0.295   | 0.94                   | [0.80 - 1.11] | 0.479   |

'+' Denotes association significant at the level  $p < 0.1$
